# Supplementary material for: Origin of fast ion diffusion in super-ionic conductors
Source: PubMed Central journal article supplement (PMC5482052; doi:10.1038/ncomms15893), 2017-06-21
Supplement: ncomms15893-s1.pdf [file ncomms15893-s1.pdf]

File name: Supplementary Information

Description: Supplementary Figures, Supplementary Tables, Supplementary Notes and  
Supplementary References

1

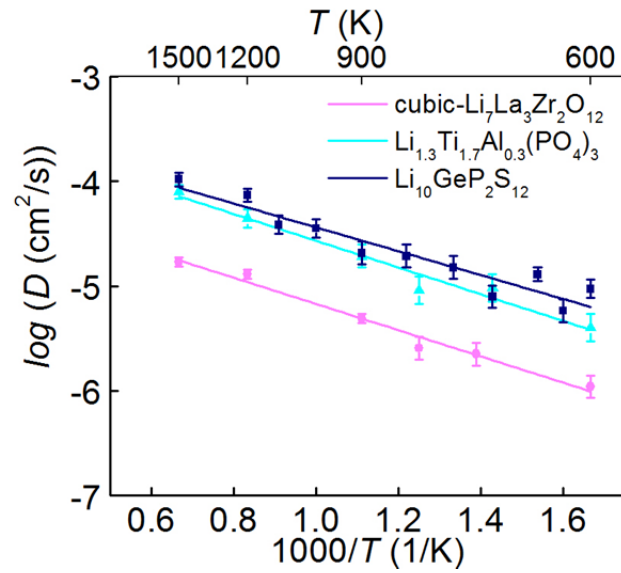

2

3 **Supplementary Figure 1. Diffusion properties of super-ionic conductors.** Arrhenius plot of

4 Li<sup>+</sup> diffusivity  $D$  in Li<sub>10</sub>GeP<sub>2</sub>S<sub>12</sub>, cubic-Li<sub>7</sub>La<sub>3</sub>Zr<sub>2</sub>O<sub>12</sub>, Li<sub>1.3</sub>Ti<sub>1.7</sub>Al<sub>0.3</sub>(PO<sub>4</sub>)<sub>3</sub> from AIMD

5 simulations. The error bar of  $D$  is the statistical uncertainty from the linear fitting of mean square  
6 displacement (MSD) over time<sup>8</sup>.

7

8

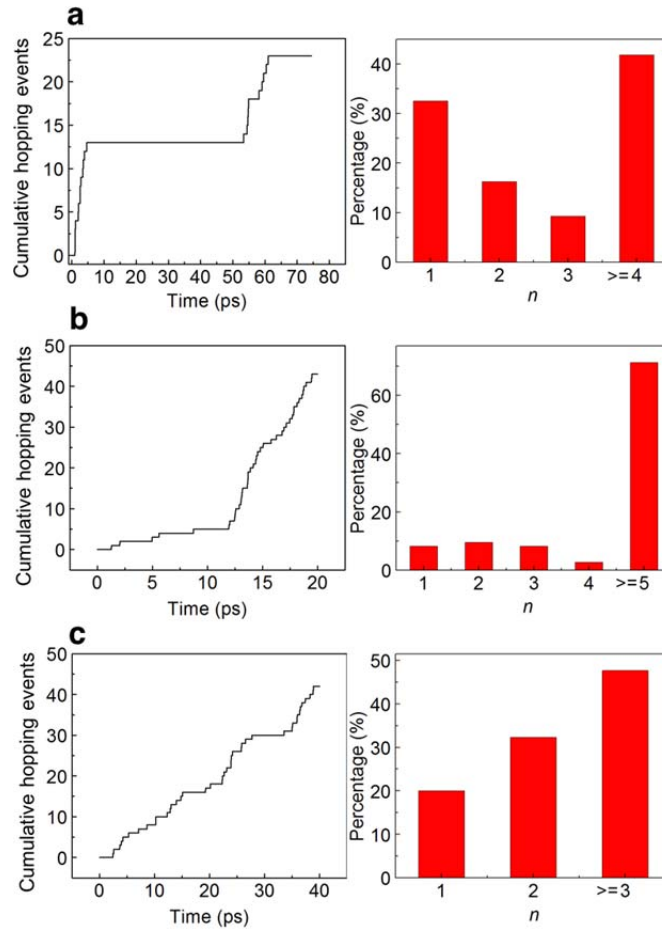

10

11 **Supplementary Figure 2. Statistical analysis of hopping events.** Cumulative hopping events  
 12 over time (left panels) and the histograms of the number  $n$  of  $\text{Li}^+$  hopping (right panels) from  
 13 AIMD simulations of (a) LGPS at 300 K, (b) cubic-phase LLZO at 600 K, (c) LATP at 600 K.

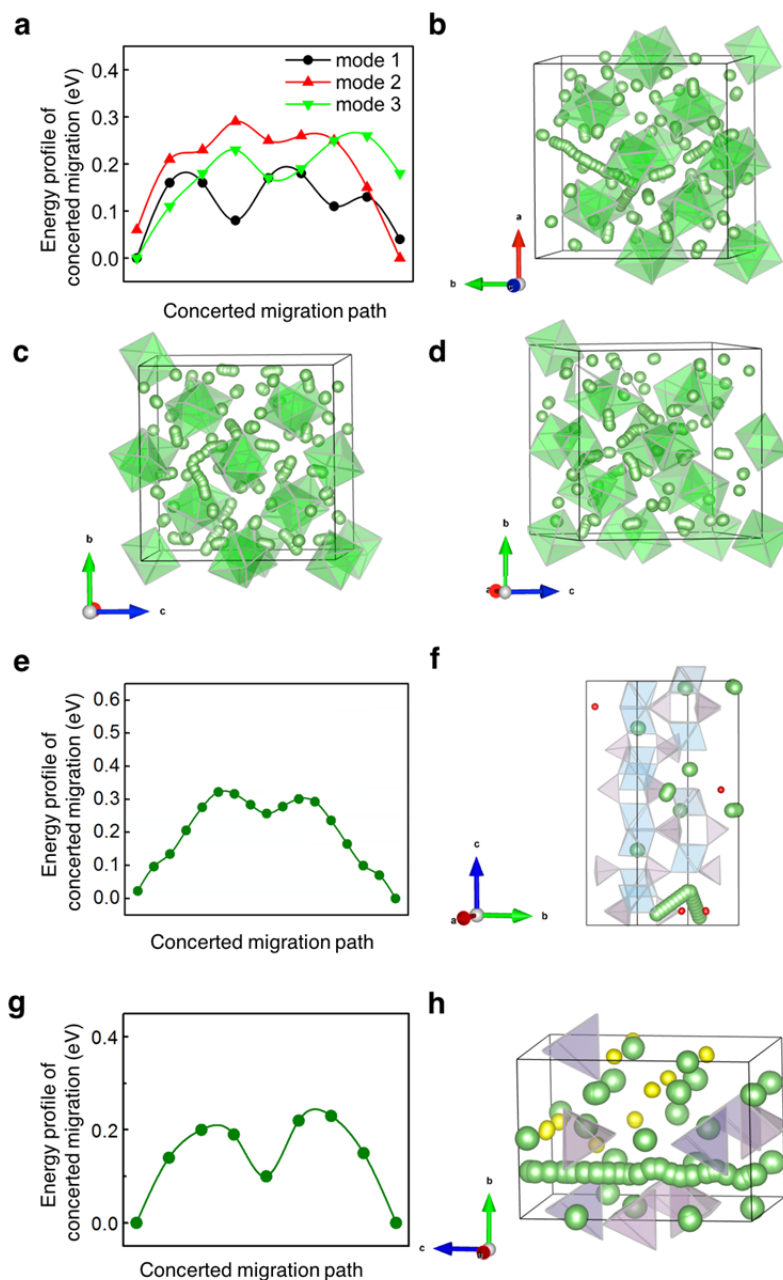

14  
 15 **Supplementary Figure 3. Other concerted migration mechanism in SICs.** Energy profile and  
 16 migration paths of  $\text{Li}^+$  concerted migration with different migration modes in (a–d) cubic-phase  
 17 LLZO at 600 K, (e–f) LATP at 600 K, (g–h) LGPS at 400 K. The migration paths (green  
 18 spheres) are merged from NEB images.  
 19

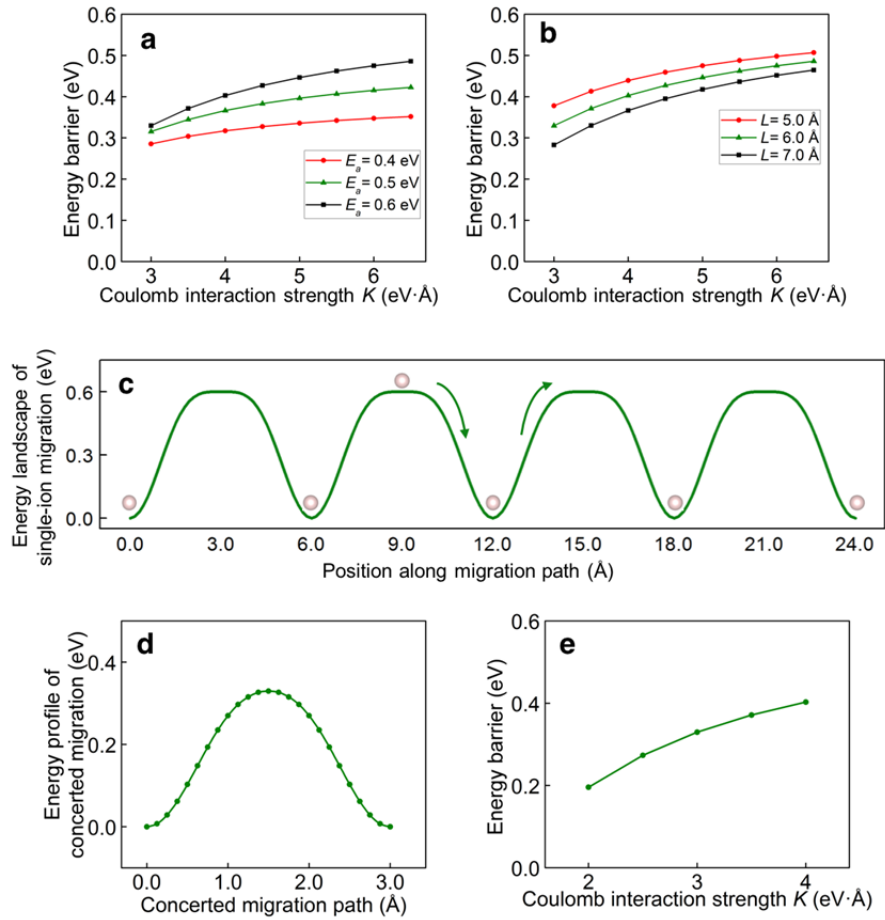

20

21 **Supplementary Figure 4. Diffusion model for concerted migration.** (a, b) The energy barrier  
 22 of concerted migration as a function of the Coulomb interaction strength  $K$  in the energy  
 23 landscape (Fig. 4a) with (a) different  $E_a$  at  $L = 6$  Å or (b) with different  $L$  at  $E_a = 0.6$  eV. (c)  
 24 Diffusion model with a different ion configuration in the energy landscape of Fig. 4a. The  
 25 mobile ion (grey sphere) configuration and the concerted migration path (arrows) are illustrated.  
 26 (d) The energy profile for the concerted migration at  $K = 3$  eV·Å. (e) The energy barrier for  
 27 concerted migration as a function of the Coulomb interaction strength  $K$ .

28

29

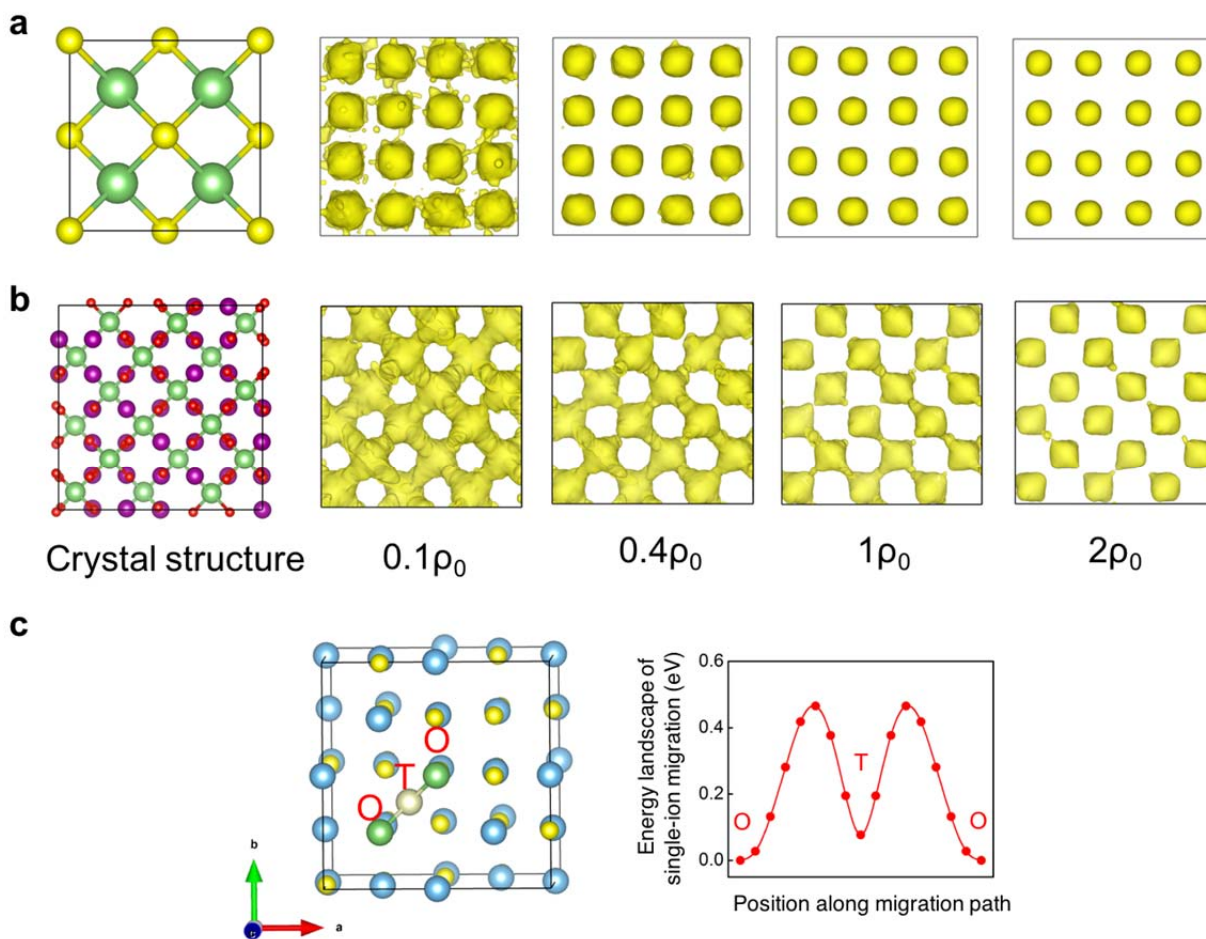

30  
 31 **Supplementary Figure 5. Li ion diffusion in non-SICs. (a, b)** Crystal structure (left) for (a)  
 32  $\text{Li}_2\text{S}$  and (b)  $\text{LiMn}_2\text{O}_4$ , and  $\text{Li}^+$  probability densities at different isosurfaces (right), where  $\rho_0$  is  
 33 the average probability density. (c) Crystal structure (left) and the energy landscape (right) of  
 34 single  $\text{Li}^+$  migration in  $\text{LiTiS}_2$ . Li, Mn, Ti, S and O are represented by green, purple, blue, yellow  
 35 and red spheres, respectively. Octahedral (O) and tetrahedral (T) sites in  $\text{LiTiS}_2$  are marked as  
 36 dark and light green spheres, respectively.

37  
 38

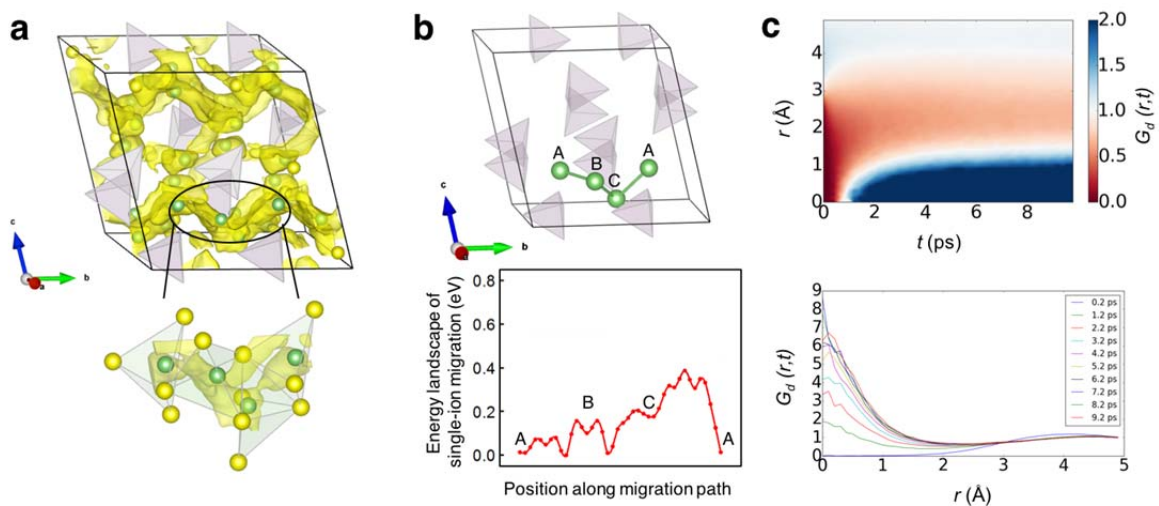

39  
 40 **Supplementary Figure 6. Li ion diffusion in Li<sub>7</sub>P<sub>3</sub>S<sub>11</sub>.** (a) Li<sup>+</sup> probability density from AIMD  
 41 at 900 K. The isosurfaces are plotted at  $4\rho_0$ , whereas  $\rho_0$  is the average density. Li<sup>+</sup>, S<sup>2-</sup>, and PS<sub>4</sub>  
 42 polyhedra are colored as green, yellow, and purple, respectively. (b) Energy landscape of single  
 43 Li<sup>+</sup> migration along typical diffusion paths. The high-energy sites are partially occupied in these  
 44 materials. c, Distinctive part of van Hove correlation function for Li ions at 900 K.

45

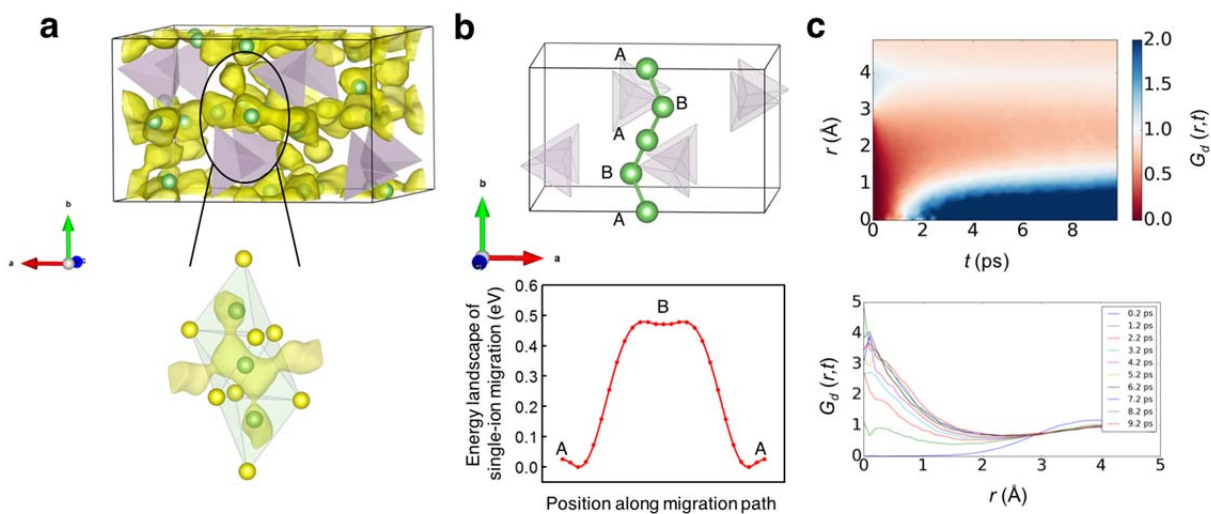

46  
 47 **Supplementary Figure 7. Li ion diffusion in  $\beta$ -Li<sub>3</sub>PS<sub>4</sub>.** (a) Li<sup>+</sup> probability density from AIMD  
 48 at 900 K. The isosurfaces are plotted at  $4\rho_0$ , whereas  $\rho_0$  is the average density. Li<sup>+</sup>, S<sup>2-</sup>, and PS<sub>4</sub>  
 49 polyhedra are colored as green, yellow, and purple, respectively. (b) Energy landscape of single  
 50 Li<sup>+</sup> migration along typical diffusion path. The high-energy sites are partially occupied in these  
 51 materials. (c) Distinctive part of van Hove correlation function for Li ions at 900 K.  
 52



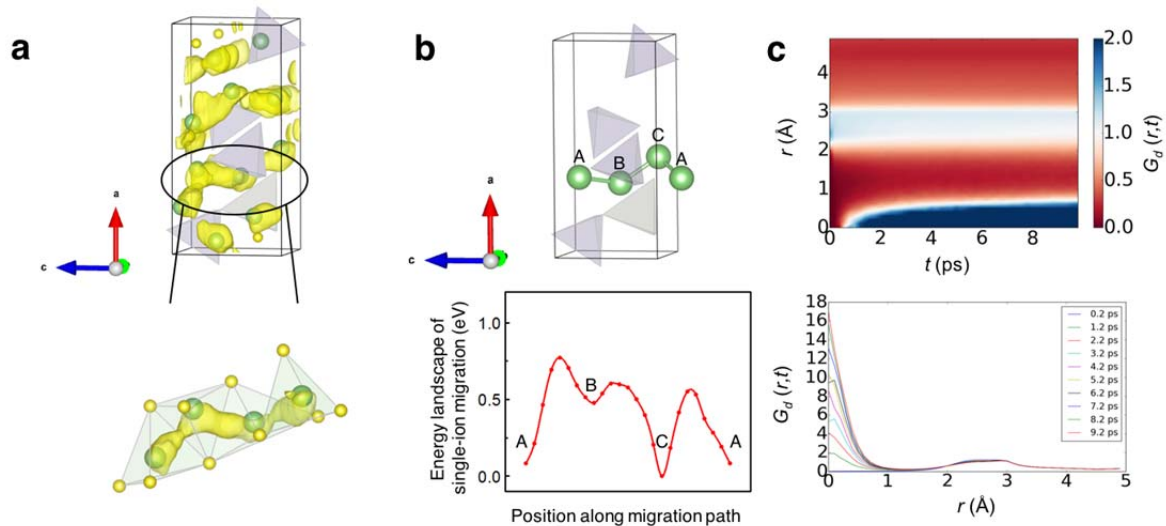

53  
 54  
 55  
 56  
 57  
 58  
 59  
 60  
 61

**Supplementary Figure 8. Li ion diffusion in  $\text{Li}_{14}\text{ZnGe}_4\text{O}_{16}$ .** (a)  $\text{Li}^+$  probability density from AIMD at 900 K. The isosurfaces are plotted at  $4\rho_0$ , whereas  $\rho_0$  is the average density.  $\text{Li}^+$ ,  $\text{O}^{2-}$ , and  $\text{GeO}_4$  polyhedra are colored as green, yellow, and purple, respectively. (b) Energy landscape of single  $\text{Li}^+$  migration along typical diffusion paths. Since Zn shares sites with Li, we removed Zn and kept  $\text{GeO}_4$  at original position in our calculation of energy landscape. The high-energy sites are partially occupied in these materials. (c) Distinctive part of van Hove correlation function for Li ions at 900 K.

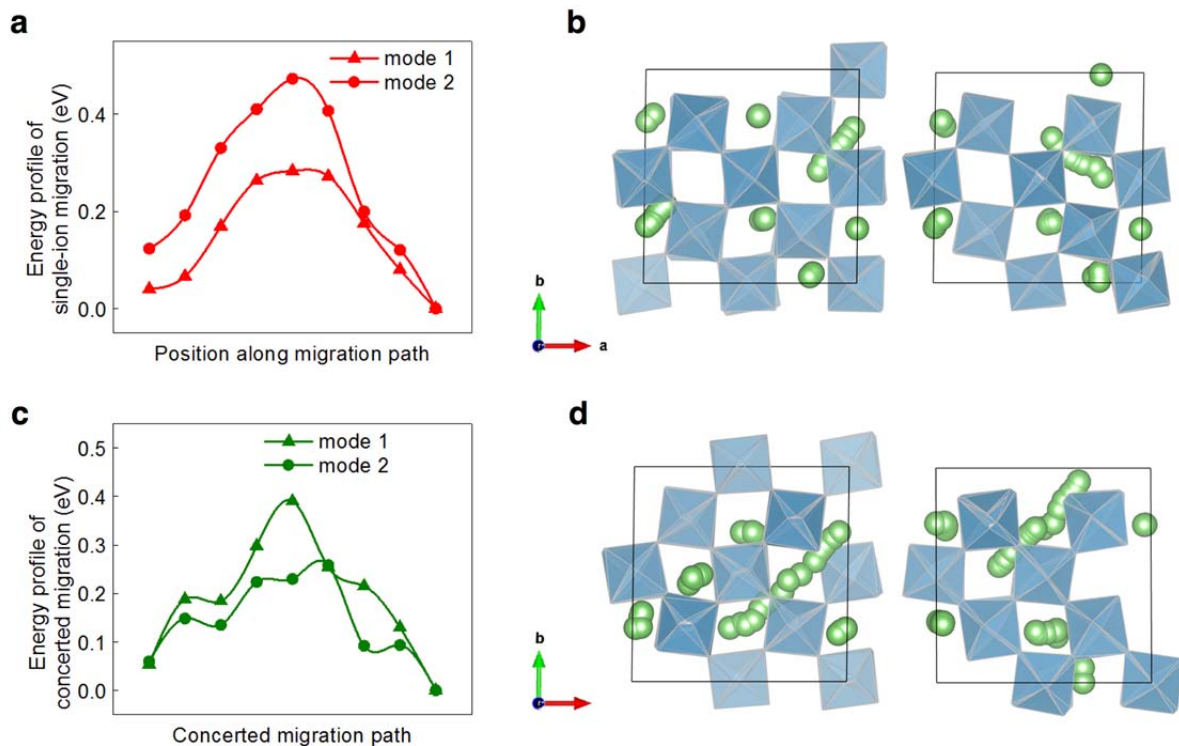

62  
 63 **Supplementary Figure 9. Li ion diffusion in  $\text{Li}_{0.31}\text{La}_{0.56}\text{TiO}_3$  (LLTO).** (a, b) Energy profile  
 64 and migration path of single  $\text{Li}^+$  migration along typical diffusion paths. (c, d) Energy profile  
 65 and migration path of concerted migration with two neighboring  $\text{Li}^+$  in LLTO. The migration  
 66 paths (green spheres) are merged from NEB images.  $\text{TiO}_6$  polyhedra are colored as blue and La  
 67 ions are not shown for clarity.  
 68

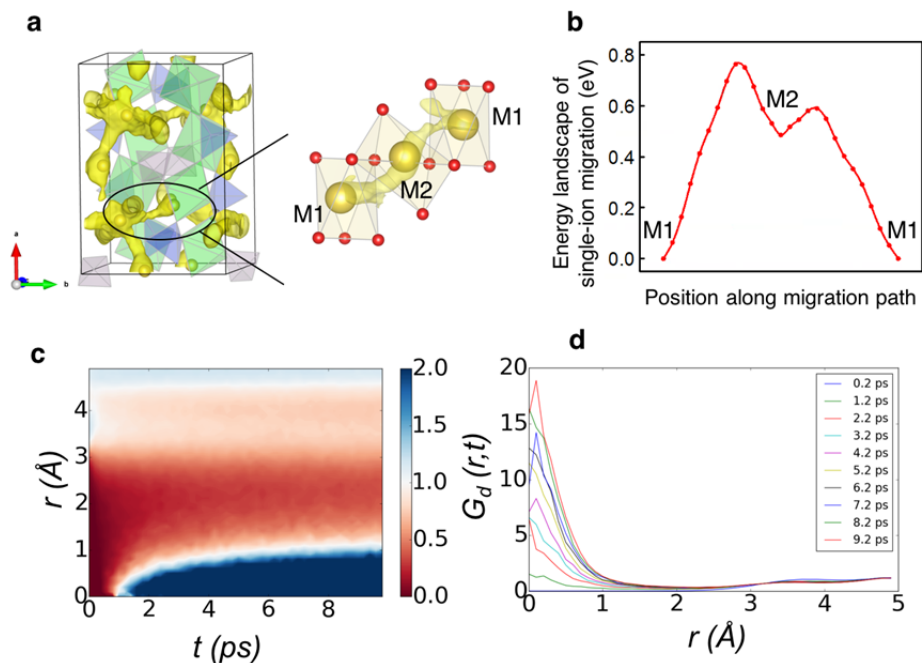

69  
 70 **Supplementary Figure 10. Na ion diffusion in NASICON. (a)**  $\text{Na}^+$  probability density in  
 71  $\text{Na}_3\text{Zr}_2\text{Si}_2\text{PO}_{12}$  from AIMD simulation at 900 K. The isosurface is plotted at  $4\rho_0$ , where  $\rho_0$  is the  
 72 average density. **(b)** Energy landscape of single  $\text{Na}^+$  migration along typical diffusion paths. **(c,**  
 73 **d)** Distinctive part of van Hove correlation function for  $\text{Na}^+$  in  $\text{Na}_3\text{Zr}_2\text{Si}_2\text{PO}_{12}$  at 900 K.  
 74

75

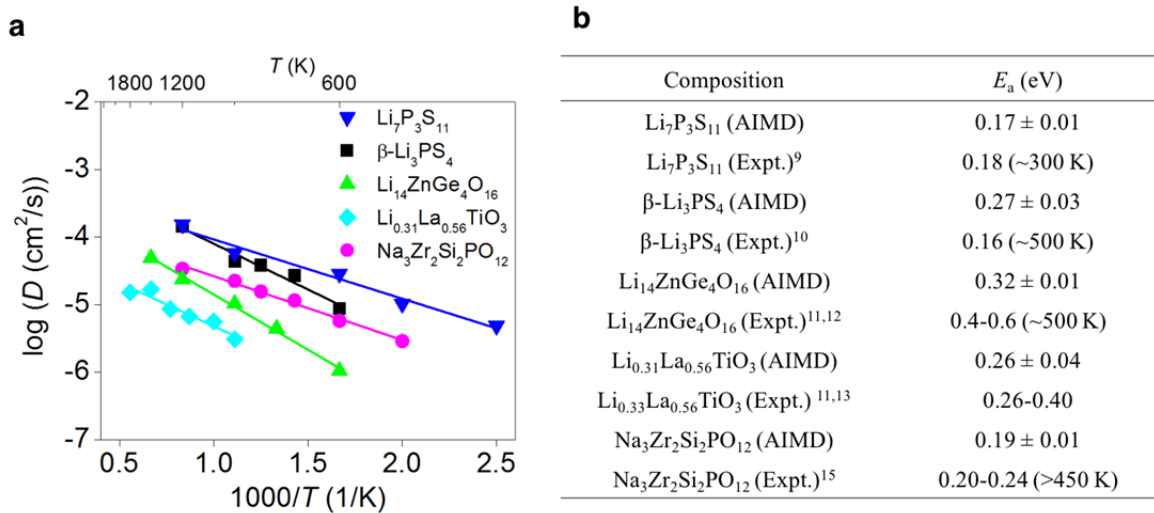

76

77 **Supplementary Figure 11. Summary of diffusion properties in other super-ionic conductors.**78 **(a)** Arrhenius plot of  $\text{Li}^+/\text{Na}^+$  diffusivity  $D$  from AIMD simulations. **(b)** Calculated (AIMD) and79 experimental (Expt.) activation energy  $E_a$ .

80

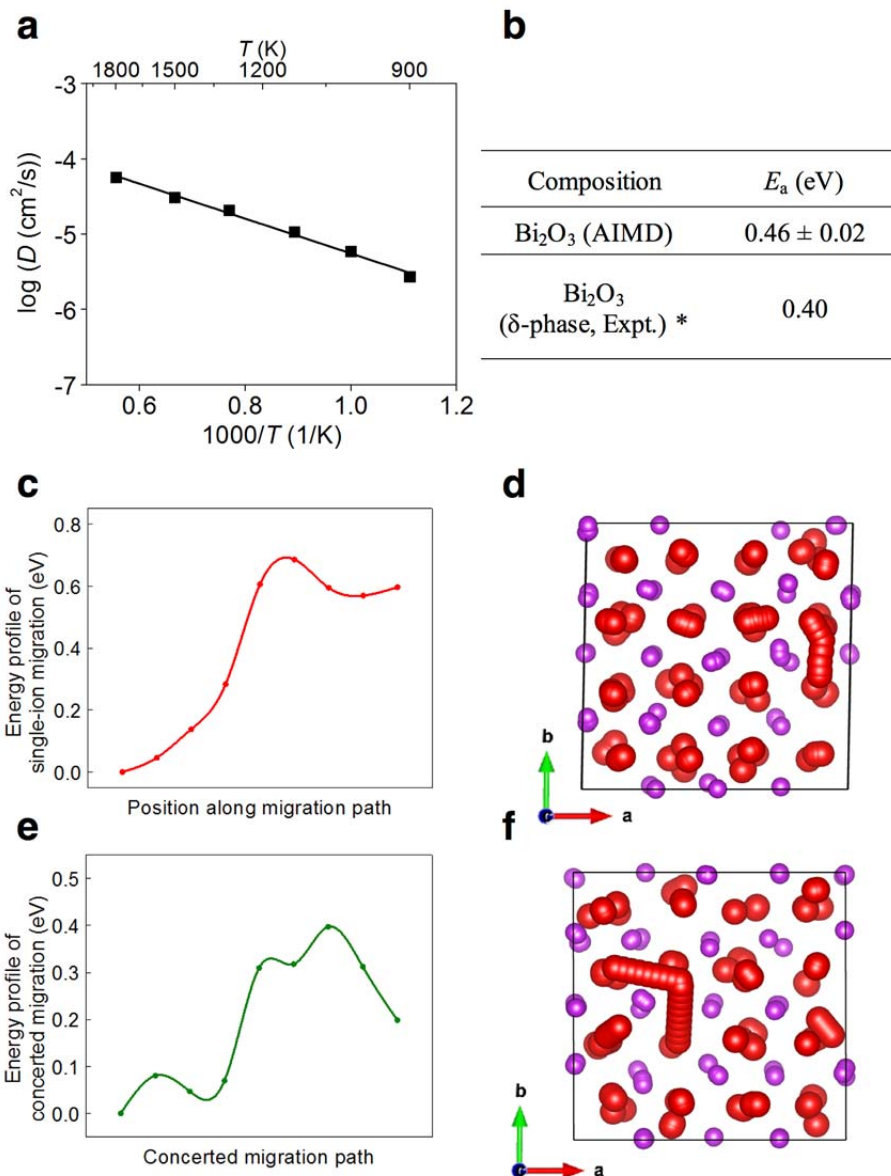

81  
 82 **Supplementary Figure 12. Oxygen ion diffusion in  $\text{Bi}_2\text{O}_3$ .** (a) Arrhenius plot of  $\text{O}^{2-}$  diffusivity  
 83  $D$  in  $\text{Bi}_2\text{O}_3$  from AIMD simulations. (b) Calculated (AIMD) and experimental (Expt.)  $\text{O}^{2-}$   
 84 activation energy  $E_a$ . (c, d) Energy profile and migration path of single  $\text{O}^{2-}$  migration along  
 85 typical diffusion paths. (e, f) Energy profile and migration path of concerted migration with two  
 86  $\text{O}^{2-}$  in  $\text{Bi}_2\text{O}_3$  at 750 K. The migration paths (red spheres) are merged from NEB images. Bi and  
 87 O ions are colored as purple and red, respectively.

88 \* Ref. 16

89

90

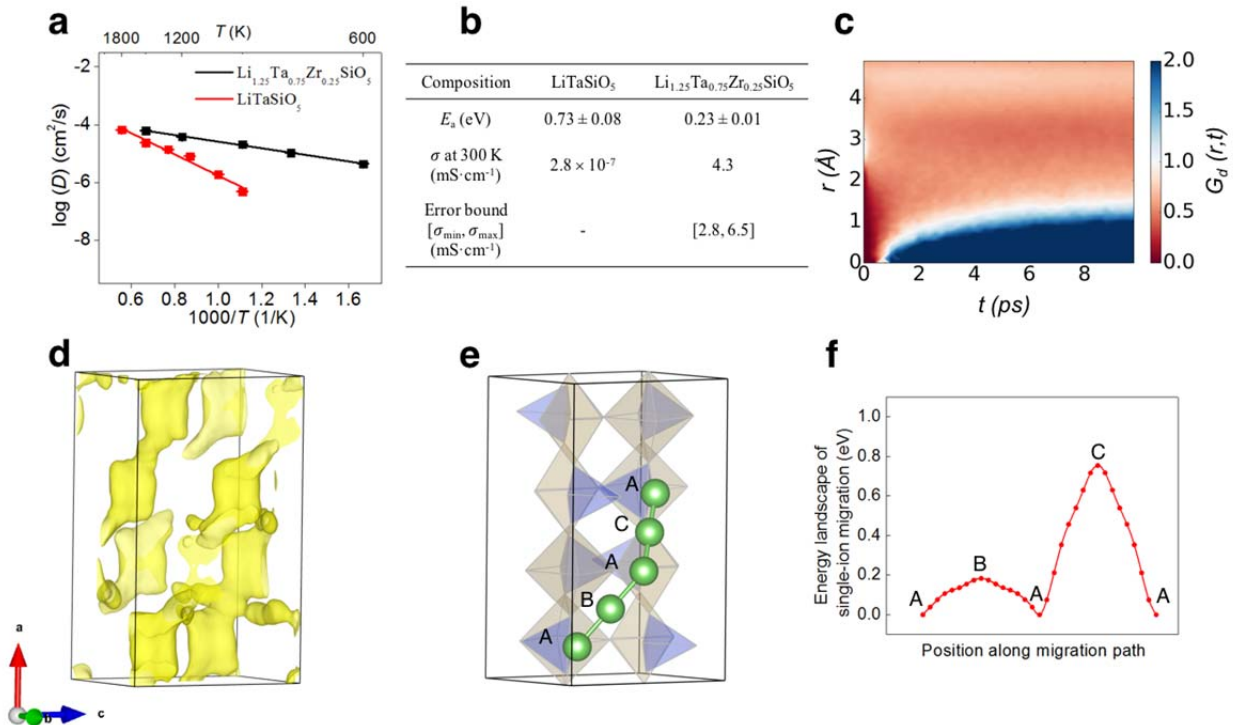

92

93 **Supplementary Figure 13. Li ion diffusion in  $\text{Li}_{1+x}\text{Ta}_{1-x}\text{Zr}_x\text{SiO}_5$  ( $x = 0, 0.25$ ).** (a) Arrhenius

94 plot of Li<sup>+</sup> diffusivity  $D$  in  $\text{Li}_{1+x}\text{Ta}_{1-x}\text{Zr}_x\text{SiO}_5$  ( $x = 0$  and  $0.25$ ) from AIMD simulations. (b)

95 Calculated Li<sup>+</sup> conductivity  $\sigma$  at 300 K and activation energy  $E_a$ . (c) Distinctive part of van Hove

96 correlation function for Li<sup>+</sup> in  $\text{Li}_{1.25}\text{Ta}_{0.75}\text{Zr}_{0.25}\text{SiO}_5$  at 900 K. (d) Li<sup>+</sup> probability density in

97  $\text{Li}_{1.25}\text{Ta}_{0.75}\text{Zr}_{0.25}\text{SiO}_5$  from AIMD simulation at 900 K. The isosurface is plotted at  $4\rho_0$ , whereas

98  $\rho_0$  is the average density. (e) Crystal structure of  $\text{LiTaSiO}_5$ . Li sites and  $\text{MO}_x$  ( $M = \text{Ta}, \text{Si}$ )

99 polyhedra are colored as green, yellow, and purple, respectively. High-energy B and C sites are

100 partially occupied in doped  $\text{Li}_{1.25}\text{Ta}_{0.75}\text{Zr}_{0.25}\text{SiO}_5$ . (f) Energy landscape of single Li<sup>+</sup> migration

101 along typical diffusion paths.

102

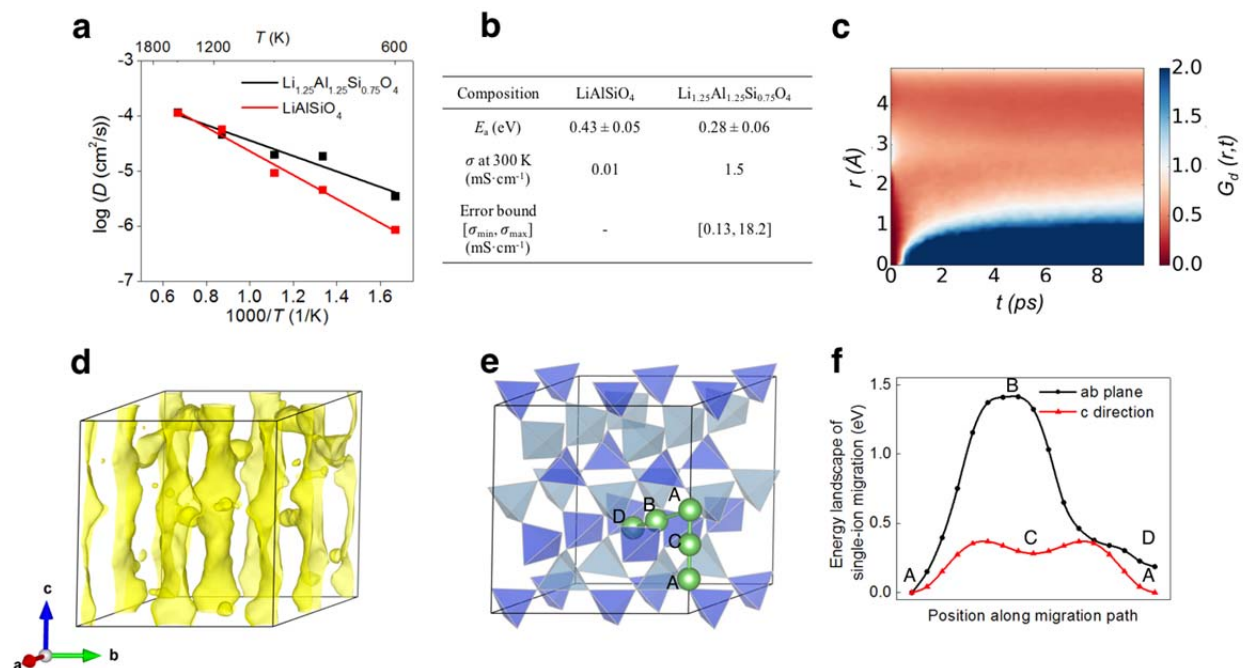

103  
 104 **Supplementary Figure 14. Li ion diffusion in  $\text{Li}_{1+x}\text{Al}_{1+x}\text{Si}_{1-x}\text{O}_4$  ( $x = 0, 0.25$ ).** (a) Arrhenius  
 105 plot of  $\text{Li}^+$  diffusivity  $D$  in  $\text{Li}_{1+x}\text{Al}_{1+x}\text{Si}_{1-x}\text{O}_4$  ( $x = 0, 0.25$ ) from AIMD simulations. (b) Calculated  
 106  $\text{Li}^+$  conductivity  $\sigma$  at 300 K and activation energy  $E_a$ . (c) Distinctive part of van Hove correlation  
 107 function for  $\text{Li}^+$  in  $\text{Li}_{1.25}\text{Al}_{1.25}\text{Si}_{0.75}\text{O}_4$  at 900 K. (d)  $\text{Li}^+$  probability density in  $\text{Li}_{1.25}\text{Al}_{1.25}\text{Si}_{0.75}\text{O}_4$   
 108 from AIMD simulation at 900 K. The isosurface is plotted at  $\rho_0$ , whereas  $\rho_0$  is the average  
 109 density. (e)  $\text{LiAlSiO}_4$  crystal structure. Li sites and  $\text{MO}_x$  ( $M = \text{Al}, \text{Si}$ ) polyhedra are colored as  
 110 green, grey, and purple, respectively. High-energy B and C sites are partially occupied in doped  
 111  $\text{Li}_{1.25}\text{Al}_{1.25}\text{Si}_{0.75}\text{O}_4$ . (f) Energy landscape of single  $\text{Li}^+$  migration along typical diffusion paths.

112

113

114 **Supplementary Table 1.** Calculated (AIMD) and experimental (Expt.)  $\text{Li}^+$  conductivity  $\sigma$  and  
 115 activation energy  $E_a$  of  $\text{Li}_{10}\text{GeP}_2\text{S}_{12}$  (LGPS),  $\text{Li}_7\text{La}_3\text{Zr}_2\text{O}_{12}$  (LLZO) and  $\text{Li}_{1.3}\text{Ti}_{1.7}\text{Al}_{0.3}(\text{PO}_4)_3$   
 116 (LATP). Error bound of calculated  $\sigma$  was estimated from the linear fitting of the Arrhenius plot  
 117 (Supplementary Fig. 1).

| Composition                                                                            | $E_a$ (eV)      | $\sigma$ at 300 K<br>(mS cm <sup>-1</sup> ) | Error bound<br>[ $\sigma_{\min}$ , $\sigma_{\max}$ ]<br>(mS cm <sup>-1</sup> ) |
|----------------------------------------------------------------------------------------|-----------------|---------------------------------------------|--------------------------------------------------------------------------------|
| $\text{Li}_{10}\text{GeP}_2\text{S}_{12}$ (AIMD)                                       | $0.23 \pm 0.03$ | 10                                          | [3.40, 30.65]                                                                  |
| $\text{Li}_{10}\text{GeP}_2\text{S}_{12}$ (Expt.) <sup>1</sup>                         | 0.24            | 12                                          |                                                                                |
| cubic- $\text{Li}_7\text{La}_3\text{Zr}_2\text{O}_{12}$ (AIMD)                         | $0.25 \pm 0.02$ | 1.3                                         | [0.47, 3.49]                                                                   |
| cubic- $\text{Li}_7\text{La}_3\text{Zr}_2\text{O}_{12}$ (Expt.)* <sup>2-4</sup>        | 0.31–0.34       | 0.31–0.51                                   |                                                                                |
| $\text{Li}_{1.3}\text{Ti}_{1.7}\text{Al}_{0.3}(\text{PO}_4)_3$ (AIMD)                  | $0.25 \pm 0.03$ | 1.1                                         | [0.30, 4.05]                                                                   |
| $\text{Li}_{1.3}\text{Ti}_{1.7}\text{Al}_{0.3}(\text{PO}_4)_3$ (Expt.)* <sup>5-7</sup> | 0.28–0.29       | 0.55–5                                      |                                                                                |

118 \* Ref. 4 are based on  $\text{Li}_7\text{La}_3\text{Zr}_2\text{O}_{12}$  with 1.7 wt% Sr doping

119 \*\* Ref. 6,7 are based on the  $\text{Li}_{1.2}\text{Ti}_{1.8}\text{Al}_{0.2}(\text{PO}_4)_3$  composition

120



121 **Supplementary Note 1. Statistical analysis of hopping events.**

122 The concerted migration is also confirmed by the timing of hopping events in AIMD  
123 simulations (Supplementary Fig. 2). Each  $\text{Li}^+$  hopping event is identified and counted at the time  
124 when a  $\text{Li}^+$  changes its occupying site; the  $\text{Li}^+$  spatial position is averaged over 2 ps to avoid  
125 counting local high-frequency vibrations. A plot of the total number of hopping events versus  
126 time shows that multiple ions hop within a short time interval ( $< 2$  ps) in LGPS, LLZO and  
127 LATP (Supplementary Fig. 2a–c).

128 In addition, we performed a statistical analysis of the timing of all  $\text{Li}^+$  hopping events in  
129 AIMD simulations.  $\text{Li}^+$  hoppings that occurred within 1 ps were grouped as one individual  
130 concerted migration event, and the number of ions  $n$  in each migration event was determined. In  
131 LGPS, LLZO, and LATP, concerted migration ( $n \geq 2$ ) dominates the overall diffusion  
132 (Supplementary Fig. 2a–c). This is further supported by the fact that in LGPS, the fast diffusion  
133 along the  $c$  direction illustrated in Fig. 3a is concerted migration, and most isolated hoppings  
134 ( $n=1$ ) correspond to the  $\text{Li}^+$  hopping in the  $ab$  direction. Thus, this statistical analysis of the  
135 timing of hopping events confirms concerted migration as the dominant diffusion mechanism in  
136 SICs.

137

138 **Supplementary Note 2. Other concerted migration mechanisms in SICs.**

139 The concerted migration mechanism in Fig. 3 is typical for LGPS, LLZO, and LATP, as  
140 observed in the AIMD simulations. Other concerted migrations observed in the AIMD  
141 simulations are also studied (Supplementary Fig. 3). In LGPS, the concerted migration of three  
142 Li ions along the  $c$  channel also shows a low activation energy barrier of 0.24 eV. In LATP, the  
143 same concerted migration mode as in Fig. 3c shows a slightly higher  $E_a$ , 0.32 eV, which is a  
144 result of different local Al/Ti configurations. In LLZO, the concerted migration modes are highly  
145 versatile. In all modes present in LLZO, multiple Li ions hop from their previous O and T sites  
146 into their nearest-neighbor T and O sites, respectively. These concerted migration processes are  
147 similar to the one illustrated in Fig. 3b except for the fact that different number of Li ions and  
148 different  $\text{Li}^+$  sublattice configurations are involved. In addition, all LLZO migrations show low  
149 migration barriers (ranging from 0.18 to 0.29 eV). Therefore, while concerted migrations may  
150 show different modes in the disordered  $\text{Li}^+$  sublattice, the energy barriers of those modes are  
151 similar to those of the typical concerted migrations shown in Fig. 3.

152 **Supplementary Note 3. Diffusion model for concerted migration.**

153 In the diffusion model in Fig. 4, the Coulomb interaction strength  $K$  among mobile ions was  
154 estimated from DFT calculations as:

155 
$$K = \frac{E_{\text{DFT}}(r_1) - E_{\text{DFT}}(r_2)}{\frac{1}{r_1} - \frac{1}{r_2}}, \quad (1)$$

156 where  $E_{\text{DFT}}(r)$  is the DFT energy of the materials framework with two Li ions at a distance  $r$ . The  
157 distances  $r_1$  and  $r_2$  are chosen as the nearest and second-nearest neighboring Li sites, so that the  
158 energy difference between  $E_{\text{DFT}}(r_1)$  and  $E_{\text{DFT}}(r_2)$  is purely from the Coulomb interaction between  
159 these two Li ions. The Coulomb interaction strength  $K$  calculated in DFT is  $2.7 \text{ eV} \cdot \text{\AA}$ ,  $2.0 \text{ eV} \cdot \text{\AA}$ ,  
160 and  $4.2 \text{ eV} \cdot \text{\AA}$  for LGPS, LLZO, and LATP, respectively.

161 The arrangement of mobile ions in the diffusion model (Fig. 4) is similar to that of the  $\text{Li}^+$   
162 configuration in LATP (Fig. 3f). All ions were allowed to relax from the initial positions. After  
163 reaching the equilibrium, the high-energy sites remained occupied. The lowest energy migration  
164 pathway was calculated using the NEB method. The NEB calculation was converged to an  
165 energy tolerance of  $< 0.001 \text{ eV}$ . We estimated the energy barrier of concerted migration in  
166 energy landscapes with different values of the barrier  $E_a$  and the unit lattice  $L$  (Supplementary  
167 Fig. 4). The barrier of concerted migration is significantly lower than the highest barrier of the  
168 energy landscape for all values of  $E_a$  and  $L$  tested.

169 In addition, we studied the diffusion model with different ion configurations, as shown in  
170 Supplementary Fig. 4c. In this model, the potential energy of the structural framework is the  
171 same as the energy landscape in Fig. 4a. Two ions (not plotted) are fixed at the position of  $-3.0$   
172  $\text{\AA}$  and  $27.0 \text{\AA}$  to provide the interactions from neighboring ions. Three high-energy sites are  
173 unoccupied, corresponding to an average site occupancy of  $\sim 67\%$ , which is close to the average  
174 site occupancy in LGPS and LLZO. In this mobile-ion configuration, the concerted migration of  
175 two ions has a barrier of  $0.2\text{--}0.4 \text{ eV}$  (Supplementary Fig. 4d), for  $K$  ranging from  $2\text{--}4 \text{ eV} \cdot \text{\AA}$ ,  
176 which is lower than the landscape barrier of  $0.6 \text{ eV}$ . As shown in the diffusion models with two  
177 different ion configurations, the concerted migration mechanism with low barriers is universal  
178 and can be activated with high-energy site occupancy, even though specific mobile ion  
179 configuration may vary for different orderings, compositions, and structural frameworks.

180

181 **Supplementary Note 4. Features in non-SIC materials.**

182 We studied  $\text{Li}_2\text{S}$ ,  $\text{LiMn}_2\text{O}_4$ , and  $\text{LiTiS}_2$  as representative materials of non-SICs. In these  
183 non-SICs, the probability density of Li ions at 900 K computed from AIMD simulations  
184 (Supplementary Fig. 5a, b) do not show the elongation features presented in the SICs (Fig. 2). In  
185 addition,  $\text{LiTiS}_2$  has an energy landscape (Supplementary Fig. 5c) similar to that in Fig. 4b in  
186 contrast to the typical energy landscape of SIC materials (Fig. 4a).

187  
188

189 **Supplementary Note 5. Structural features and concerted migration in other ionic**  
190 **conductors.**

191 We also verified the identified structural features and concerted migration mechanism in  
192 other Li ionic conductors, such as  $\text{Li}_7\text{P}_3\text{S}_{11}$ ,  $\text{Li}_{14}\text{ZnGe}_4\text{O}_{16}$  (LISICON), and  $\beta\text{-Li}_3\text{PS}_4$ . The  
193 activation energies of  $\text{Li}_7\text{P}_3\text{S}_{11}$ ,  $\text{Li}_{14}\text{ZnGe}_4\text{O}_{16}$ , and  $\beta\text{-Li}_3\text{PS}_4$  from AIMD simulations are 0.17 eV,  
194 0.32 eV and 0.27 eV, respectively, which are in good agreement with experimental values at  
195 similar temperature ranges (Supplementary Fig. 11).<sup>9–12</sup> The energy landscape of single  $\text{Li}^+$   
196 migration (Supplementary Fig. 6–8) has high energy barriers: 0.39, 0.48, and 0.77 eV for  
197  $\text{Li}_7\text{P}_3\text{S}_{11}$ ,  $\beta\text{-Li}_3\text{PS}_4$ , and  $\text{Li}_{14}\text{ZnGe}_4\text{O}_{16}$ , respectively, and the high-energy sites are occupied. Thus,  
198 the concerted migration has lower migration barrier than the energy landscape. The distinctive  
199 part of the van Hove correlation function (Supplementary Fig. 6–8) also suggests concerted  
200 migration of Li ions. The  $\text{Li}^+$  probability density in these materials (Supplementary Fig. 6–8)  
201 also shows elongation along the migration directions, similar to those in LGPS, LLZO, and  
202 LATP (Fig. 2d–f). Therefore, the key features of SICs are observed in these materials, and our  
203 proposed mechanism reduces the migration barrier in these SICs.

204 In  $\text{Li}_{0.31}\text{La}_{0.56}\text{TiO}_3$  (LLTO), the activation energy computed in AIMD simulations is 0.26  
205 eV, which is in good agreement with experimental values.<sup>11,13</sup> We also observed the concerted  
206 migration of multiple Li ions in the AIMD simulations. The migration barriers of such concerted  
207 migrations in NEB calculations are as low as 0.26–0.39 eV (Supplementary Fig. 9). The single-  
208 ion migration, which is also observed as a typical migration mode in AIMD simulations, has a  
209 similarly low energy barrier.<sup>14</sup> LLTO is slightly different from other SICs in that both single-ion  
210 and concerted migration contribute to ionic transport. Our proposed mechanism is still active and  
211 hence reduces the energy barrier of concerted migrations of multiple ions.

212 The identified mechanism and structural features are also observed in the Na super-ionic  
213 conductor  $\text{Na}_3\text{Zr}_2\text{Si}_2\text{PO}_{12}$  (NASICON). The concerted migration of Na ions is observed and  $\text{Na}^+$   
214 probability densities show elongation along the diffusion path (Supplementary Fig. 10). The  
215 experimental activation energy of  $\text{Na}_3\text{Zr}_2\text{Si}_2\text{PO}_{12}$  is 0.20–0.24 eV at temperatures greater than  
216 450 K<sup>15</sup>, but the energy landscape of single  $\text{Na}^+$  to migrate within the structural framework has a  
217 higher energy barrier of 0.78 eV (Supplementary Fig. 7). In consistent with the mechanism in  
218 LATP, the occupied high-energy sites promote concerted migration with a reduced energy  
219 barrier.

220 For O ion conductors, we studied fluorite-structure  $\text{Bi}_2\text{O}_3$ , which has the same structure as  
221 other fast O ion conductors, such as  $\text{CeO}_2$  and  $\text{ZrO}_2$ . In our calculations, the activation energy  
222 from AIMD simulations is 0.46 eV (Supplementary Fig. 12), which is in good agreement with  
223 experiments.<sup>16</sup> We found that concerted migration of two  $\text{O}^{2-}$  has the low energy barrier of 0.4  
224 eV, similar to the barrier observed in the AIMD simulations. This barrier is lower than that for  
225 single ion migration, suggesting that our proposed mechanism is active in reducing the barrier  
226 for concerted migration.

227

### 228 **Supplementary Note 6. Prediction and design of new Li ionic conductors.**

229 We selected new structures  $\text{LiTaSiO}_5$  (space group  $P12_1/c1$ , ICSD-39648) and  $\text{LiAlSiO}_4$   
230 (space group  $P6_422$ , ICSD-2929), as the model systems to demonstrate designing new fast ionic  
231 conductor materials. These compounds were selected by screening all compounds in the ICSD  
232 database with the following criteria: 1) No transition metal elements, such as V, Mn, Fe, Co and  
233 Ni, which are known to induce electronic conduction; 2) big bottleneck size  $> 0.5 \text{ \AA}$  of diffusion  
234 channel; and 3) Li percolation network with Li-Li site distance  $< 3 \text{ \AA}$ . Among many materials  
235 suggested by these criteria, we chose  $\text{LiTaSiO}_5$  and  $\text{LiAlSiO}_4$  as model systems, because they  
236 have not been studied for Li ion transport.

237 These compounds were doped through aliovalent cation substitution to introduce extra Li into  
238 high-energy Li sites. The Li sublattice of the doped structures was reordered to obtain a low-  
239 energy  $\text{Li}^+$  configuration.  $\text{LiTaSiO}_5$  shows relatively slow Li diffusion ( $E_a = 0.73 \pm 0.08 \text{ eV}$ ,  $\sigma_{300\text{K}}$

240 =  $2.8 \times 10^{-7}$  mS cm<sup>-1</sup>) with a high activation energy due to the high-barrier energy landscape  
241 (Supplementary Fig. 13). The doped Li<sub>1.25</sub>Ta<sub>0.75</sub>Zr<sub>0.25</sub>SiO<sub>5</sub> is obtained by substituting Ta<sup>5+</sup> with  
242 Zr<sup>4+</sup>, and has extra Li ions occupying a fraction of high-energy B and C sites (Supplementary Fig.  
243 13). As a result, concerted migration of Li ions is activated, leading to a significantly lower  
244 activation energy and higher ionic conductivity ( $E_a = 0.23 \pm 0.01$  eV,  $\sigma_{300K} = 4.3$  mS cm<sup>-1</sup>).  
245 Similarly, Li<sub>1.25</sub>Al<sub>1.25</sub>Si<sub>0.75</sub>O<sub>4</sub>, the doped LiAlSiO<sub>4</sub> structure resulting from the substitution of Si<sup>4+</sup>  
246 with Al<sup>3+</sup>, has additional Li ions occupying some high-energy B and C sites (Supplementary Fig.  
247 14) in addition to the low-energy A and D sites originally occupied in LiAlSiO<sub>4</sub>. Slow Li<sup>+</sup>  
248 diffusion in LiAlSiO<sub>4</sub> ( $E_a = 0.43 \pm 0.05$  eV,  $\sigma_{300K} = 0.01$  mS cm<sup>-1</sup>) is significantly increased in  
249 Li<sub>1.25</sub>Al<sub>1.25</sub>Si<sub>0.75</sub>O<sub>4</sub> ( $E_a = 0.28 \pm 0.06$  eV,  $\sigma_{300K} = 1.5$  mS cm<sup>-1</sup>).

250

251

252

253

254 **Supplementary References**

255

- 256 1 Kamaya, N. *et al.* A lithium superionic conductor. *Nat. Mater.* **10**, 682–686 (2011).
- 257 2 Murugan, R., Thangadurai, V. & Weppner, W. Fast lithium ion conduction in garnet-type  
258  $\text{Li}_7\text{La}_3\text{Zr}_2\text{O}_{12}$ . *Angew. Chem. Int. Ed.* **46**, 7778–7781 (2007).
- 259 3 Li, Y. *et al.* Ionic distribution and conductivity in lithium garnet  $\text{Li}_7\text{La}_3\text{Zr}_2\text{O}_{12}$ . *J. Power*  
260 *Sources* **209**, 278–281 (2012).
- 261 4 Dumon, A., Huang, M., Shen, Y. & Nan, C. W. High Li ion conductivity in strontium  
262 doped  $\text{Li}_7\text{La}_3\text{Zr}_2\text{O}_{12}$  garnet. *Solid State Ionics* **243**, 36–41 (2013).
- 263 5 Aono, H., Sugimoto, E., Sadaoka, Y., Imanaka, N. & Adachi, G. Y. Ionic conductivity  
264 and sinterability of lithium titanium phosphate system. *Solid State Ionics* **40/41**, 38–42  
265 (1990).
- 266 6 Arbi, K. *et al.* Lithium mobility in  $\text{Li}_{1.2}\text{Ti}_{1.8}\text{R}_{0.2}(\text{PO}_4)_3$  compounds (R=Al, Ga, Sc, In) as  
267 followed by NMR and impedance spectroscopy. *Chem. Mater.* **16**, 255–262 (2004).
- 268 7 Arbi, K., Mandal, S., Rojo, J. & Sanz, J. Dependence of ionic conductivity on  
269 composition of fast ionic conductors  $\text{Li}_{1+x}\text{Ti}_{2-x}\text{Al}_x(\text{PO}_4)_3$ ,  $0 \leq x \leq 0.7$ . a parallel NMR and  
270 electric impedance study. *Chem. Mater.* **14**, 1091–1097 (2002).
- 271 8 He, X. & Mo, Y. Accelerated materials design of  $\text{Na}_{0.5}\text{Bi}_{0.5}\text{TiO}_3$  oxygen ionic conductors  
272 based on first principles calculations. *Phys. Chem. Chem. Phys.* **17**, 18035–18044 (2015).
- 273 9 Seino, Y., Ota, T., Takada, K., Hayashi, A. & Tatsumisago, M. A sulphide lithium super  
274 ion conductor is superior to liquid ion conductors for use in rechargeable batteries.  
275 *Energy Environ. Sci.* **7**, 627–631 (2014).
- 276 10 Homma, K. *et al.* Crystal structure and phase transitions of the lithium ionic conductor  
277  $\text{Li}_3\text{PS}_4$ . *Solid State Ionics* **182**, 53–58 (2011).

- 278 11 Knauth, P. Inorganic solid Li ion conductors: An overview. *Solid State Ionics* **180**, 911–  
279 916 (2009).
- 280 12 Bruce, P. & West, A. Ionic conductivity of LISICON solid solutions,  $\text{Li}_{2+2x}\text{Zn}_{1-x}\text{GeO}_4$ . *J.*  
281 *Solid State Chem.* **44**, 354–365 (1982).
- 282 13 Ma, C. *et al.* Mesoscopic framework enables facile ionic transport in solid electrolytes for  
283 Li batteries. *Adv. Energy Mater.* **6**, 1600053 (2016).
- 284 14 Catti, M. Short-range order and  $\text{Li}^+$  ion diffusion mechanisms in  $\text{Li}_5\text{La}_9\text{O}_{22}(\text{TiO}_3)_{16}$   
285 (LLTO). *Solid State Ionics* **183**, 1–6 (2011).
- 286 15 Baur, W., Dygas, J., Whitmore, D. & Faber, J. Neutron powder diffraction study and  
287 ionic conductivity of  $\text{Na}_2\text{Zr}_2\text{SiP}_2\text{O}_{12}$  and  $\text{Na}_3\text{Zr}_2\text{Si}_2\text{PO}_{12}$ . *Solid State Ionics* **18**, 935–943  
288 (1986).
- 289 16 Harwig, H. A. & Gerards, A. G. Electrical properties of the  $\alpha$ ,  $\beta$ ,  $\gamma$ , and  $\delta$  phases of  
290 bismuth sesquioxide. *J. Solid State Chem.* **26**, 265–274 (1978).  
291  
292
